# Supplementary material for: Changes in emotions and worries during the Covid-19 pandemic: an online-survey with children and adults with and without mental health conditions
Source: Springer Nature journal article supplement (doi:10.1186/s13034-021-00363-9), 2021-02-21

### a) How worried was your child generally?

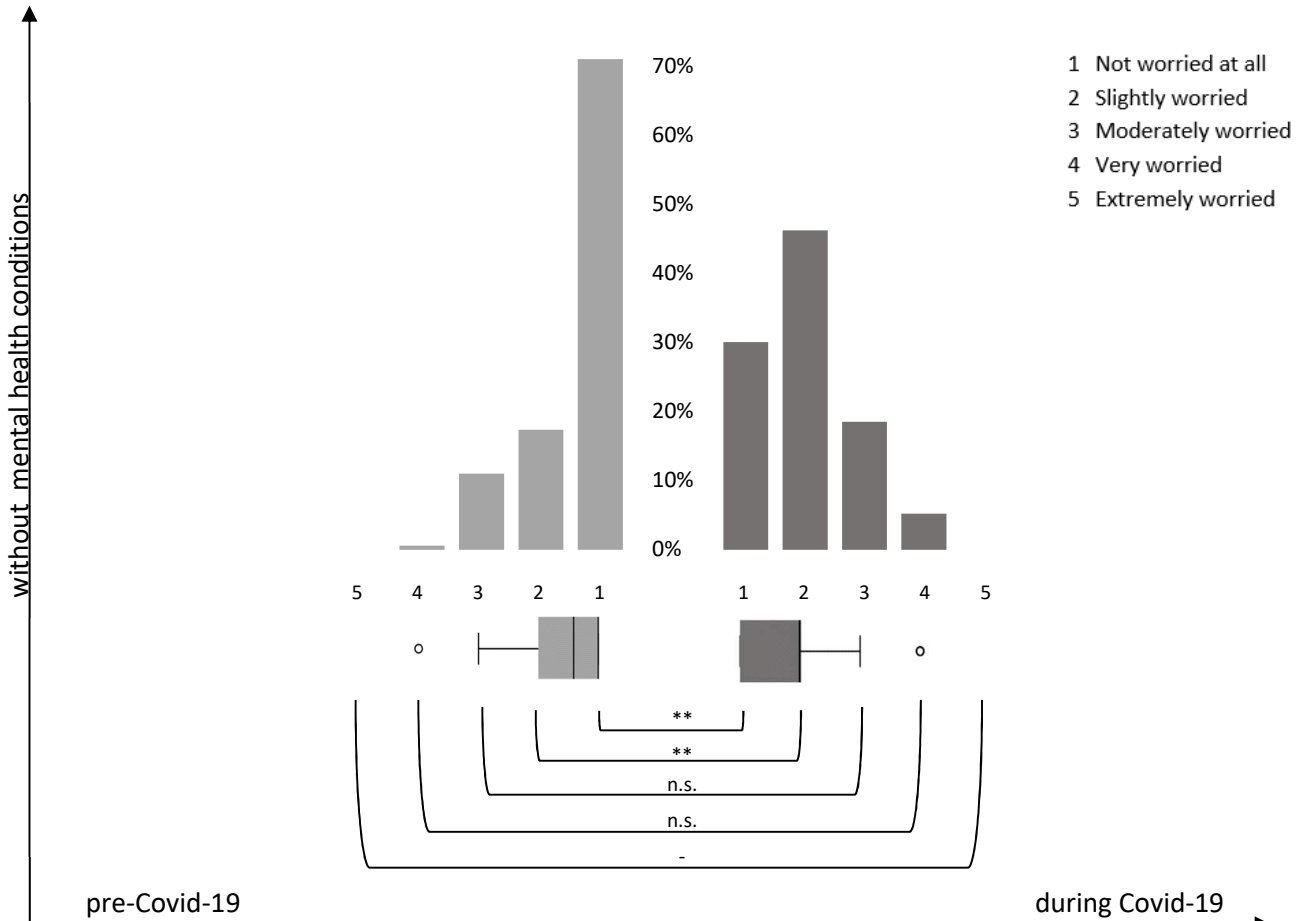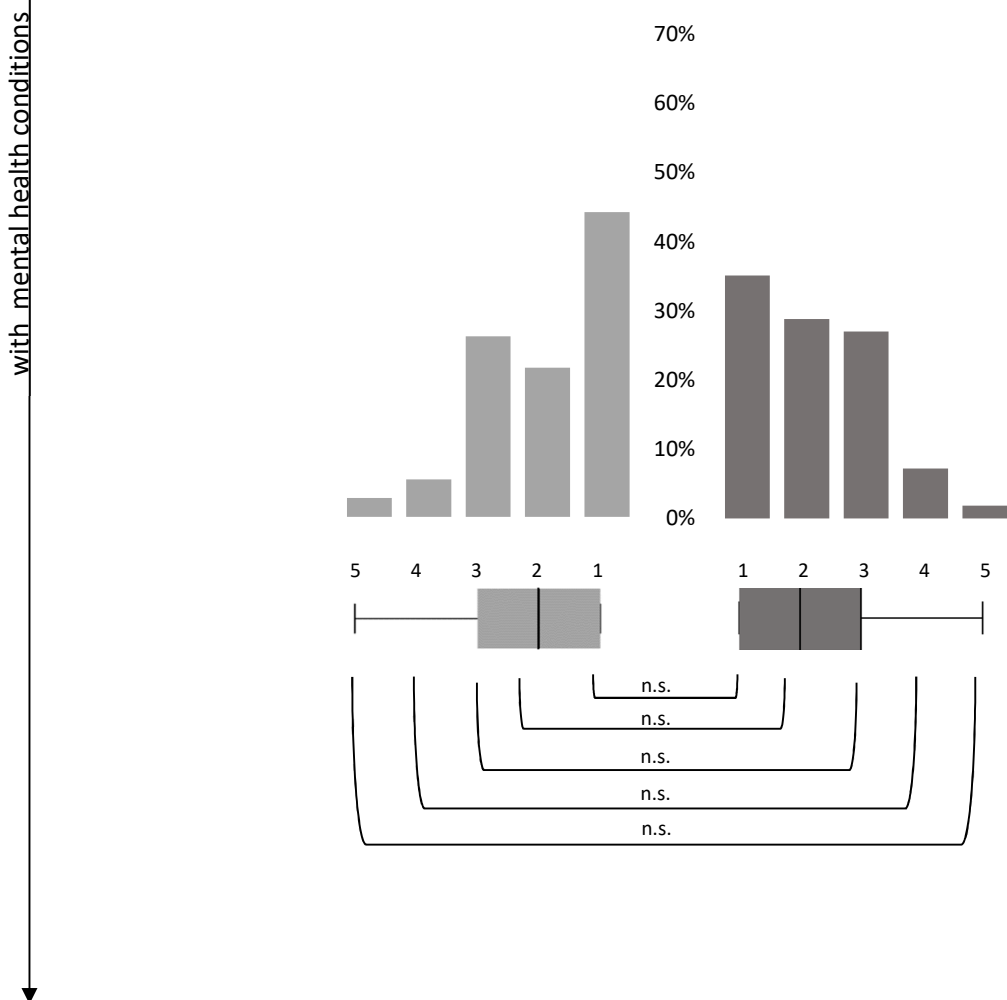

b) How happy versus sad was your child?

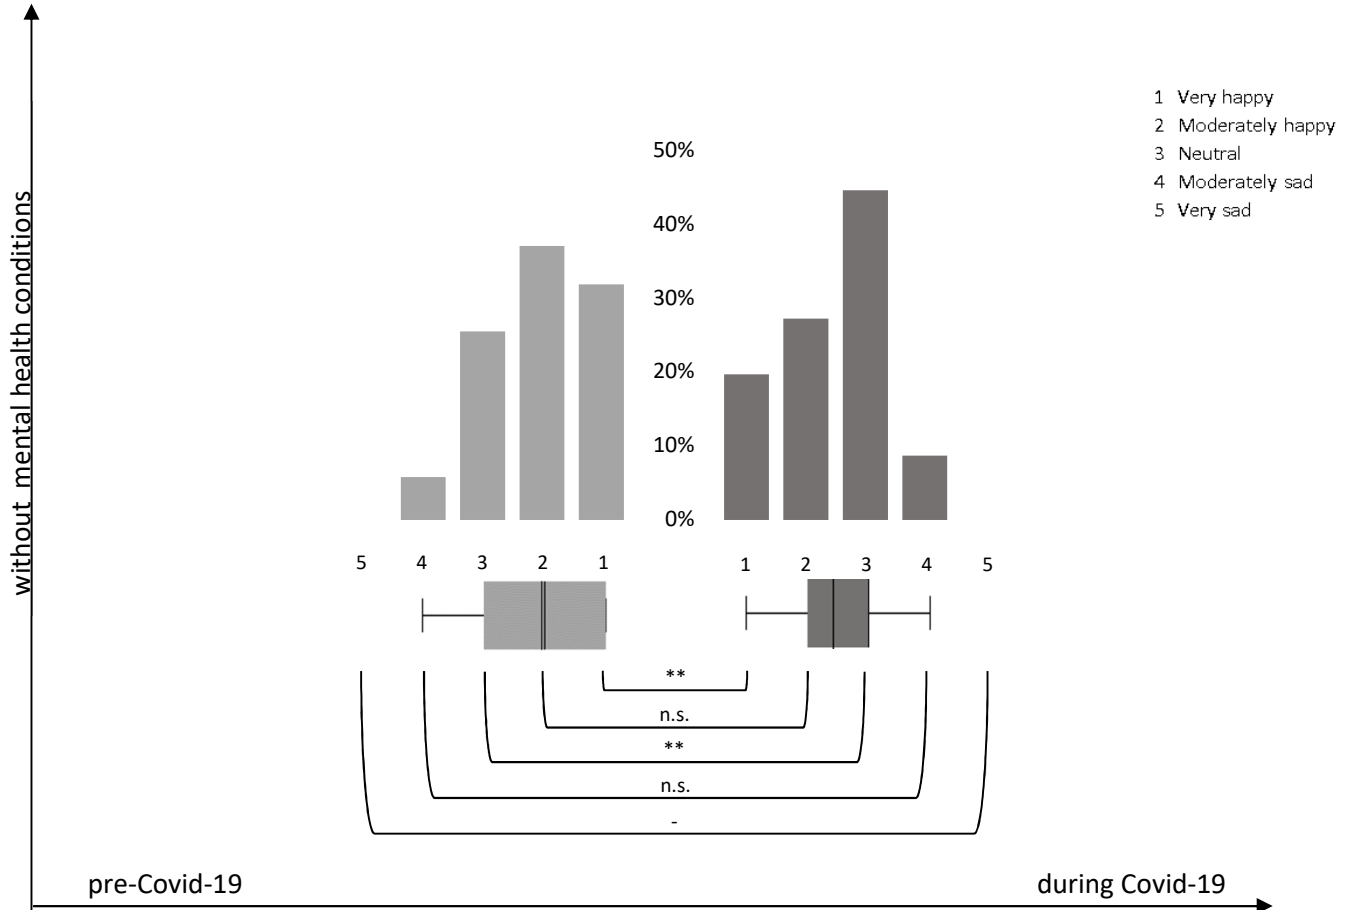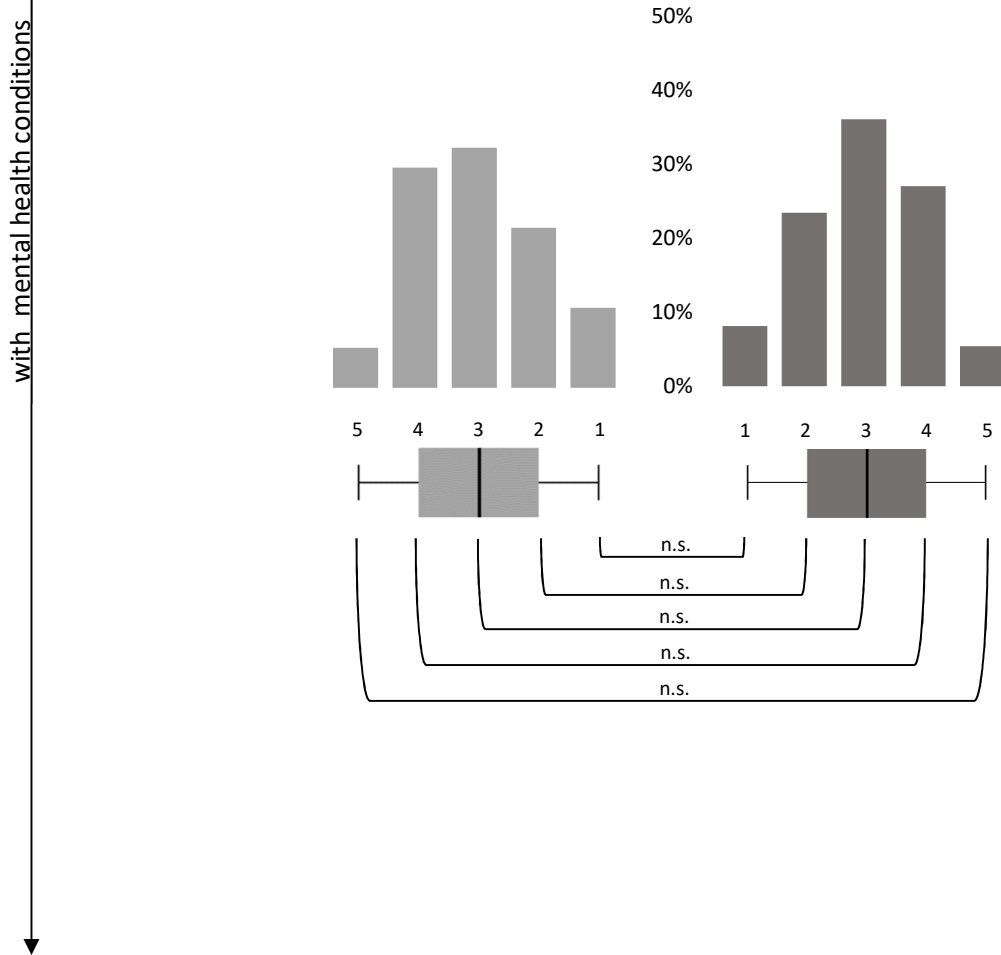

c) How much did your child enjoy their usual activities?

- 1 very much
- 2 very
- 3 moderately
- 4 slightly
- 5 not at all

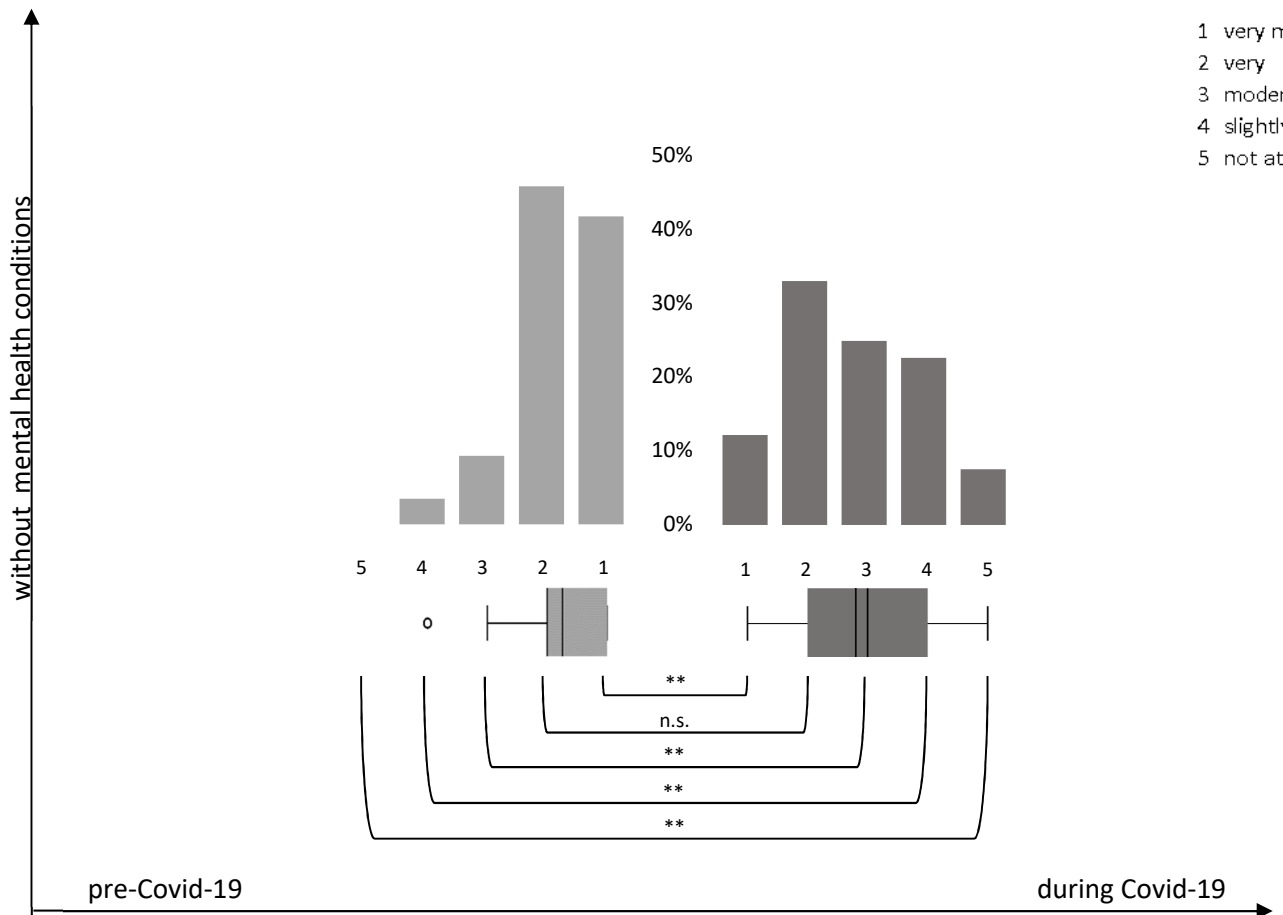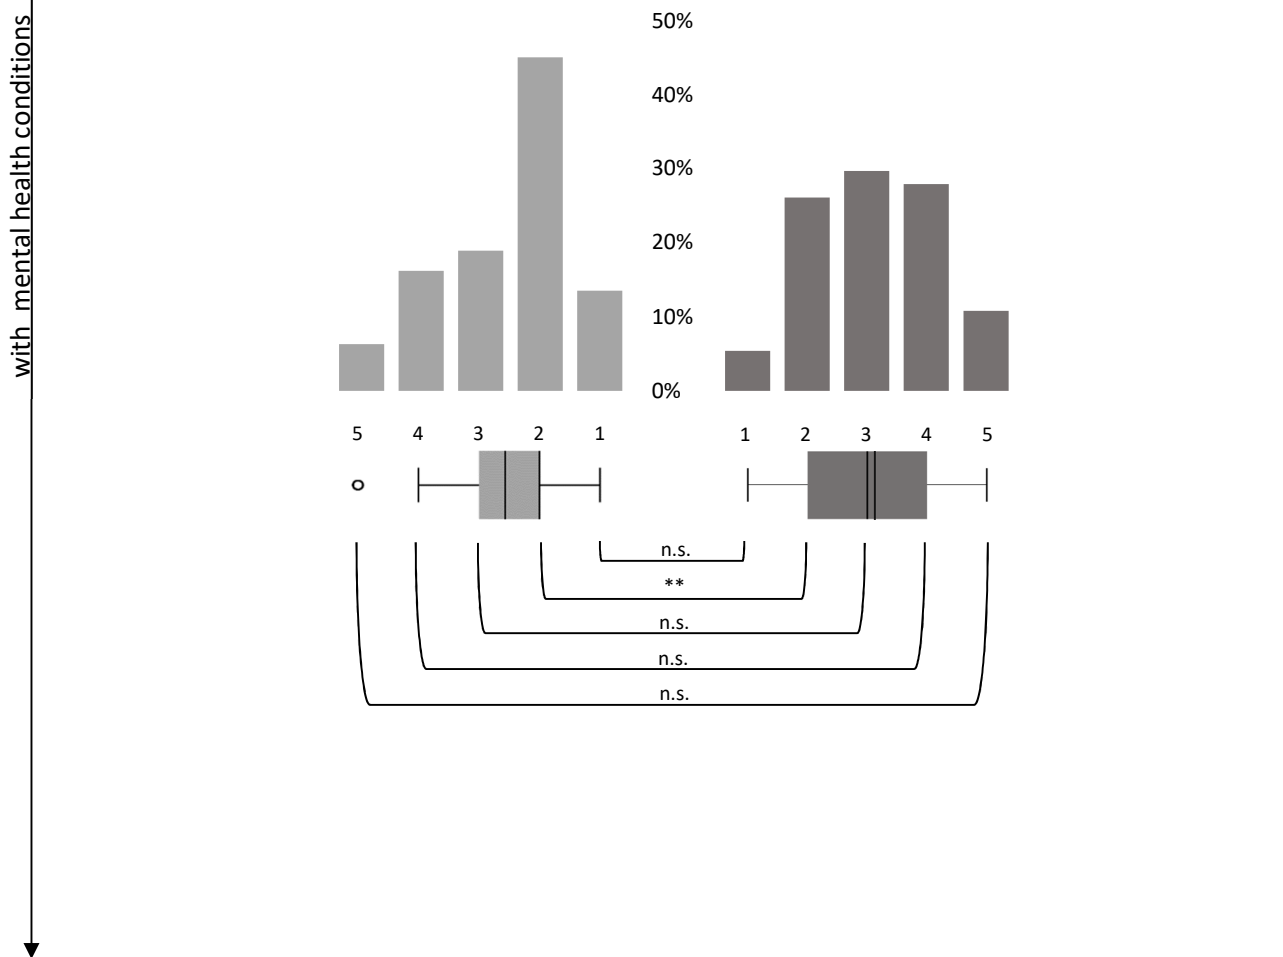

d) How relaxed versus anxious was your child?

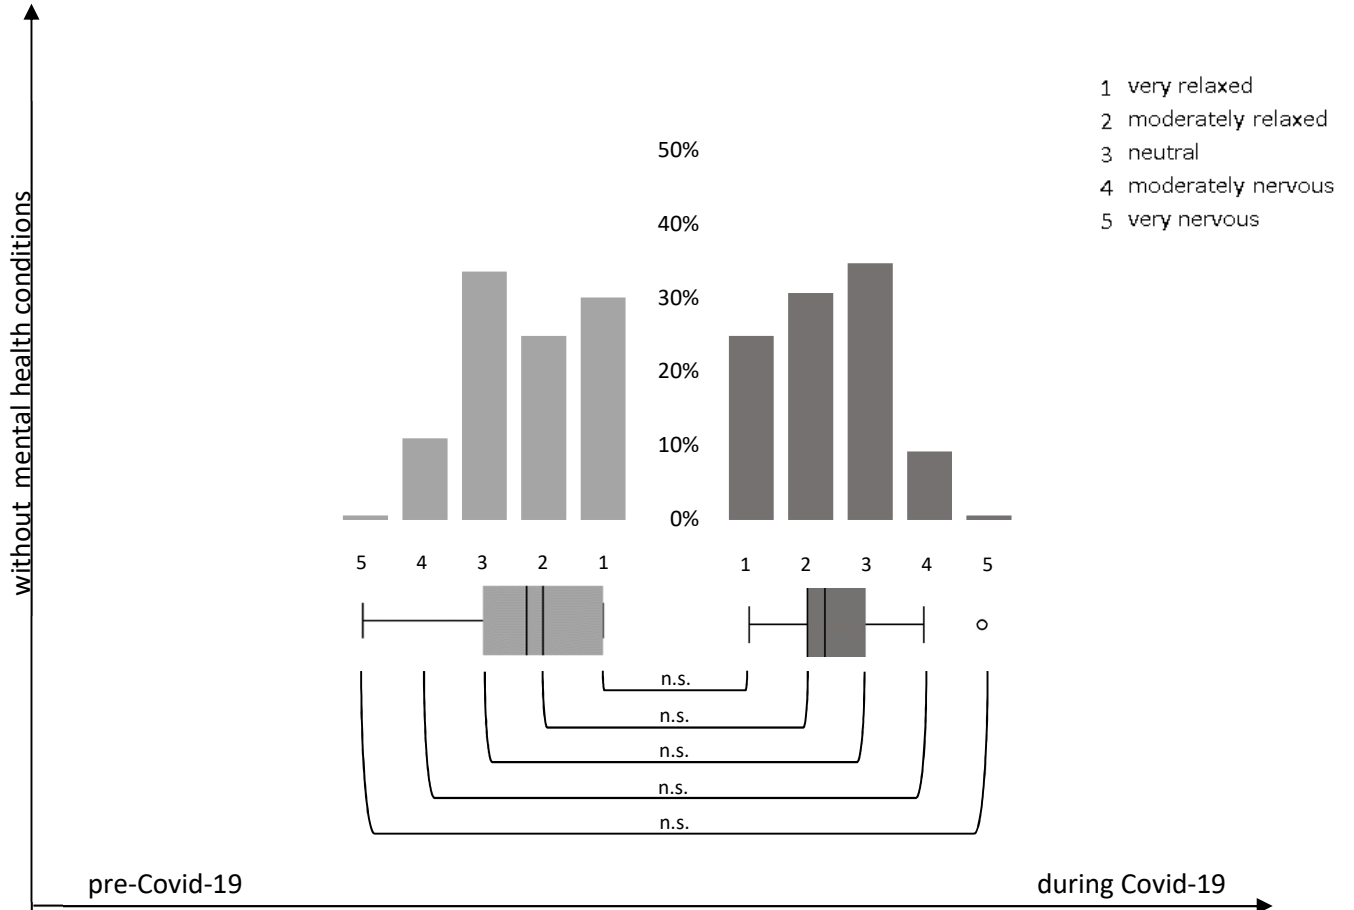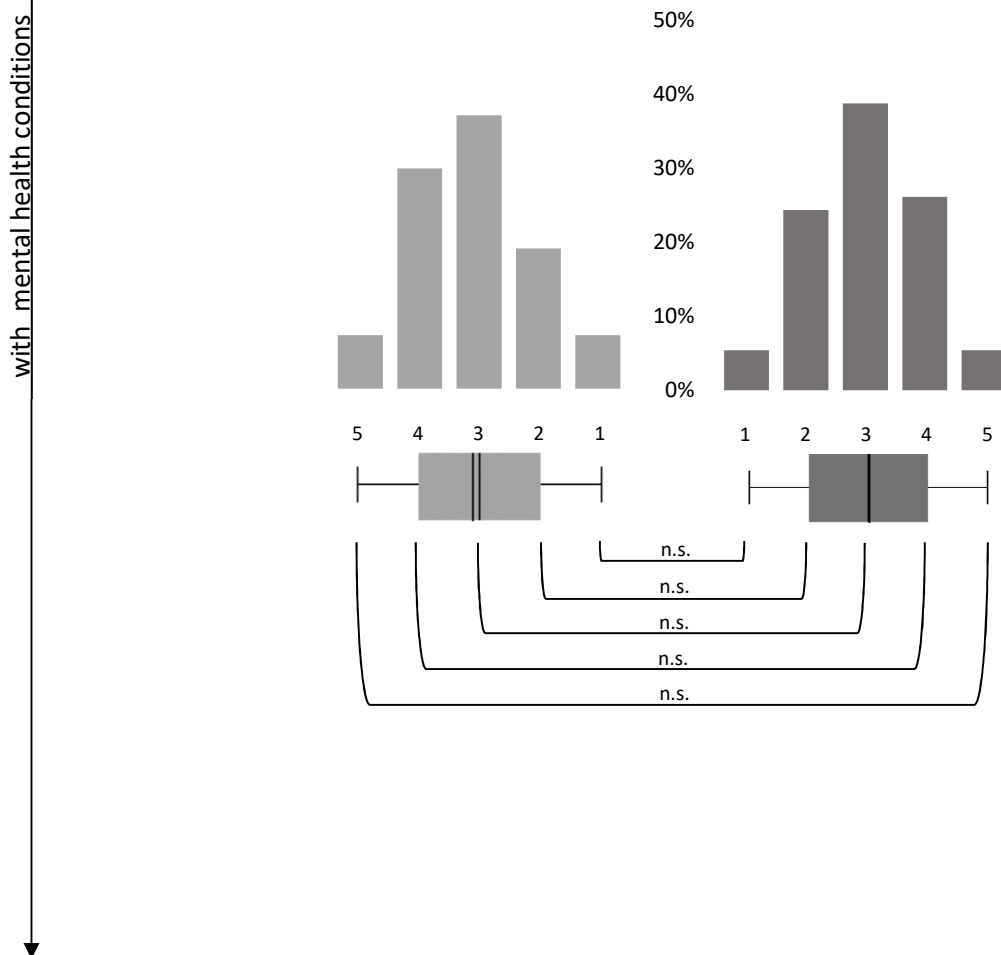

e) How fidgety or restless was your child?

- 1 not fidgety
- 2 slightly fidgety
- 3 moderately fidgety
- 4 very fidgety
- 5 extremely fidgety

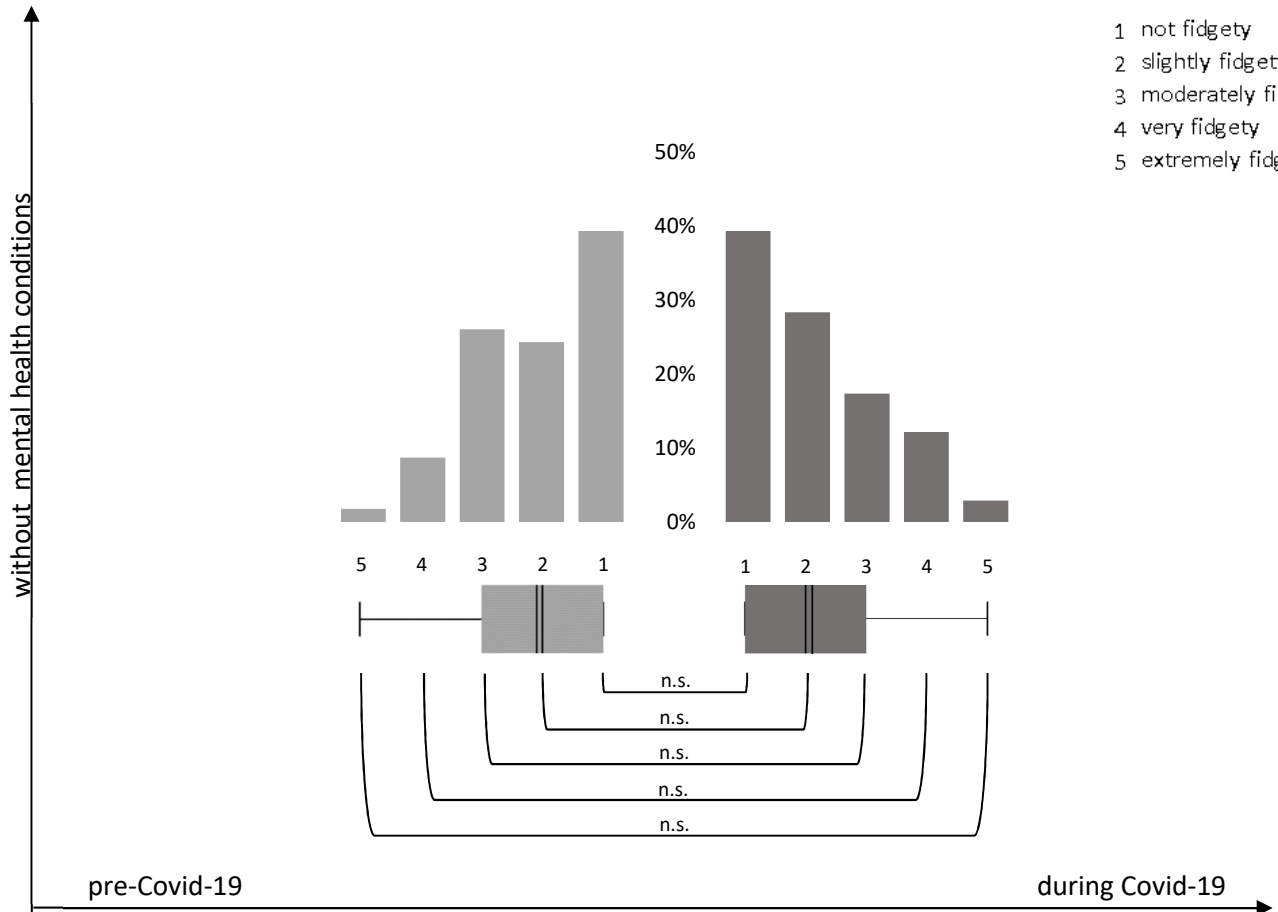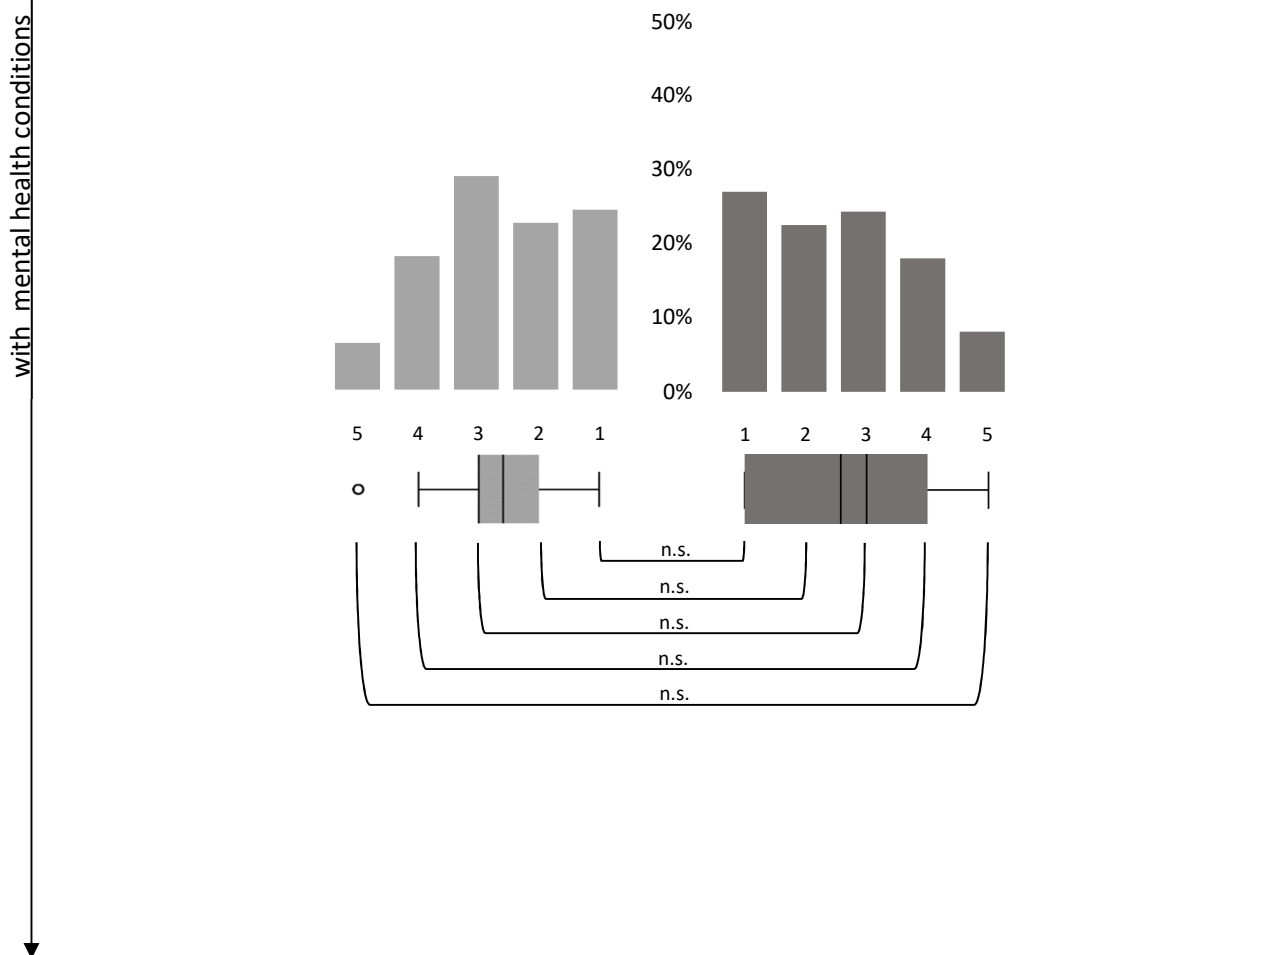

f) How fatigued or tired was your child?

- 1 not fatigued
- 2 slightly fatigued
- 3 moderately fatigued
- 4 very fatigued
- 5 extremely fatigued

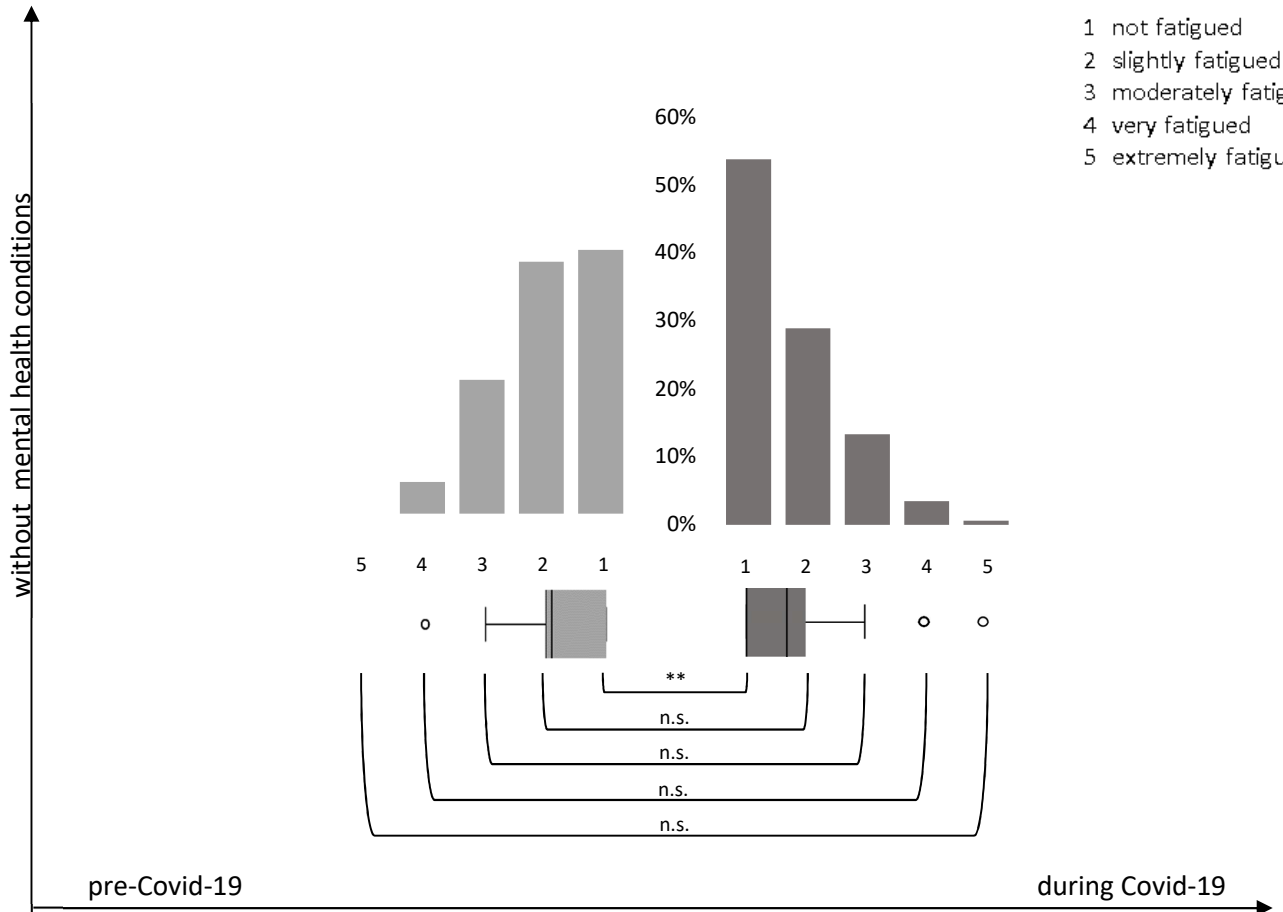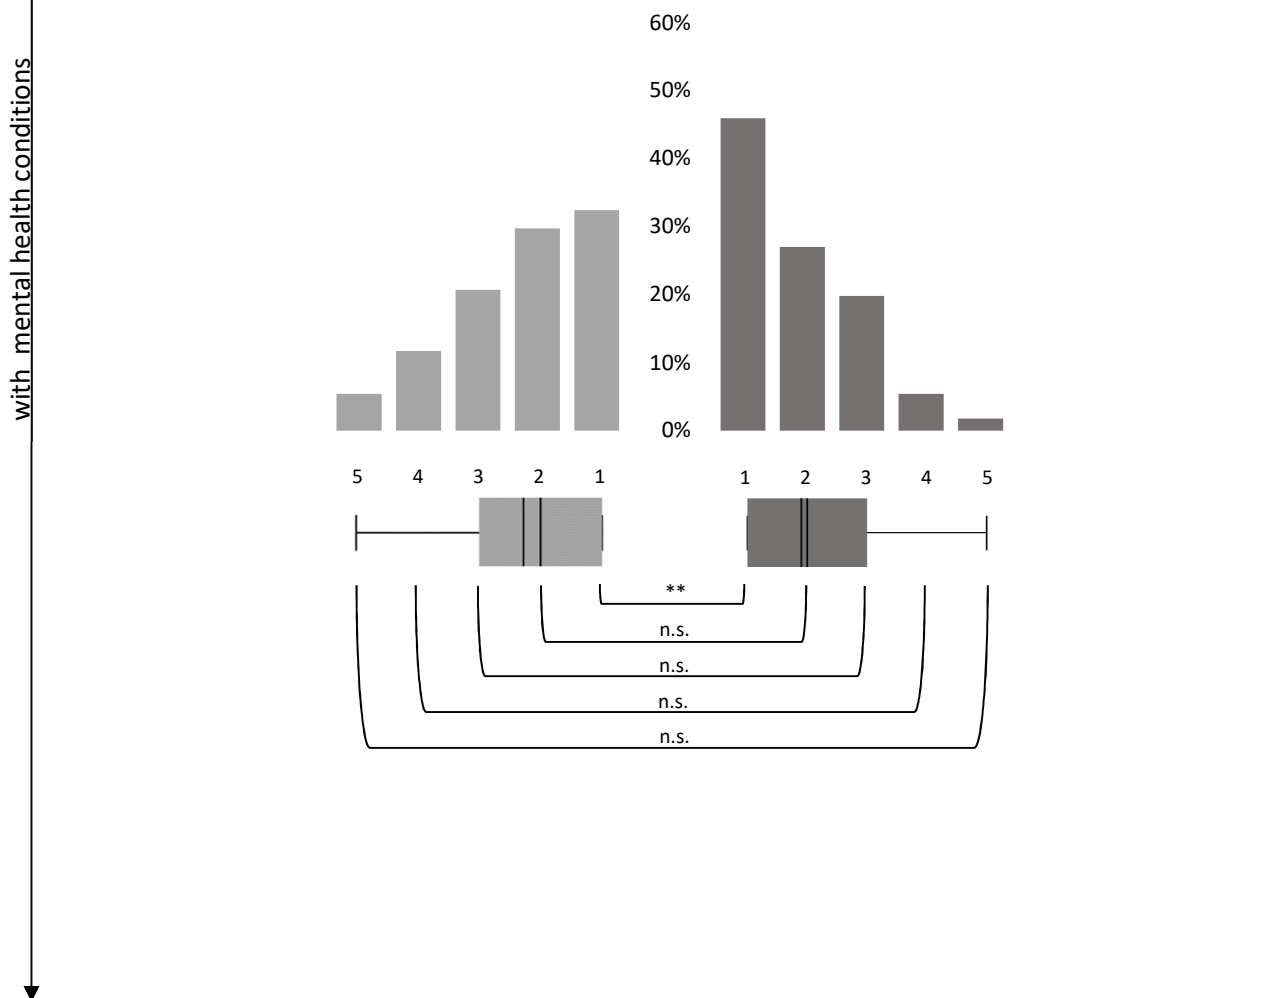

g) How well was your child able to concentrate or focus?

- 1 very focused
- 2 moderately focused
- 3 neutral
- 4 moderately unfocused
- 5 very unfocused

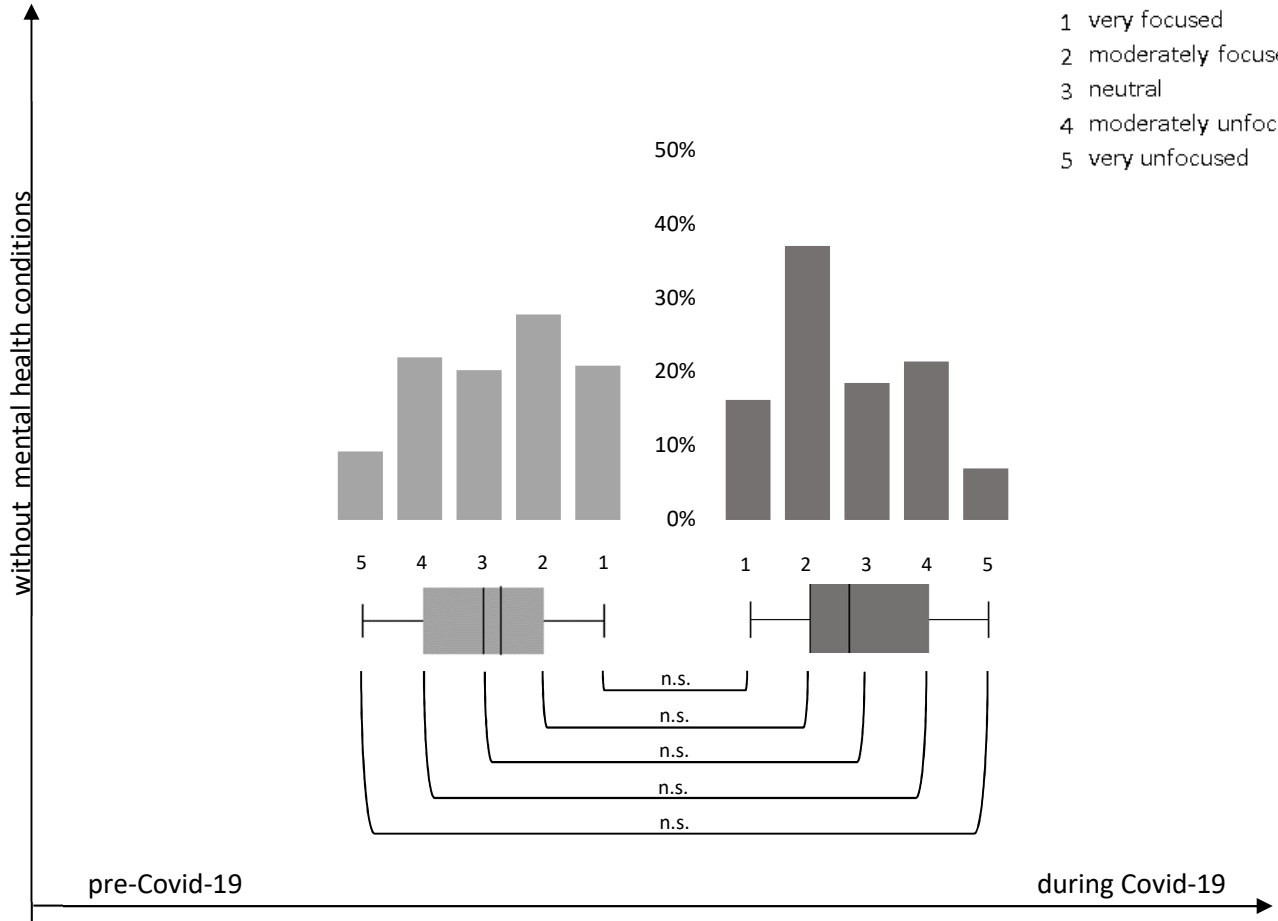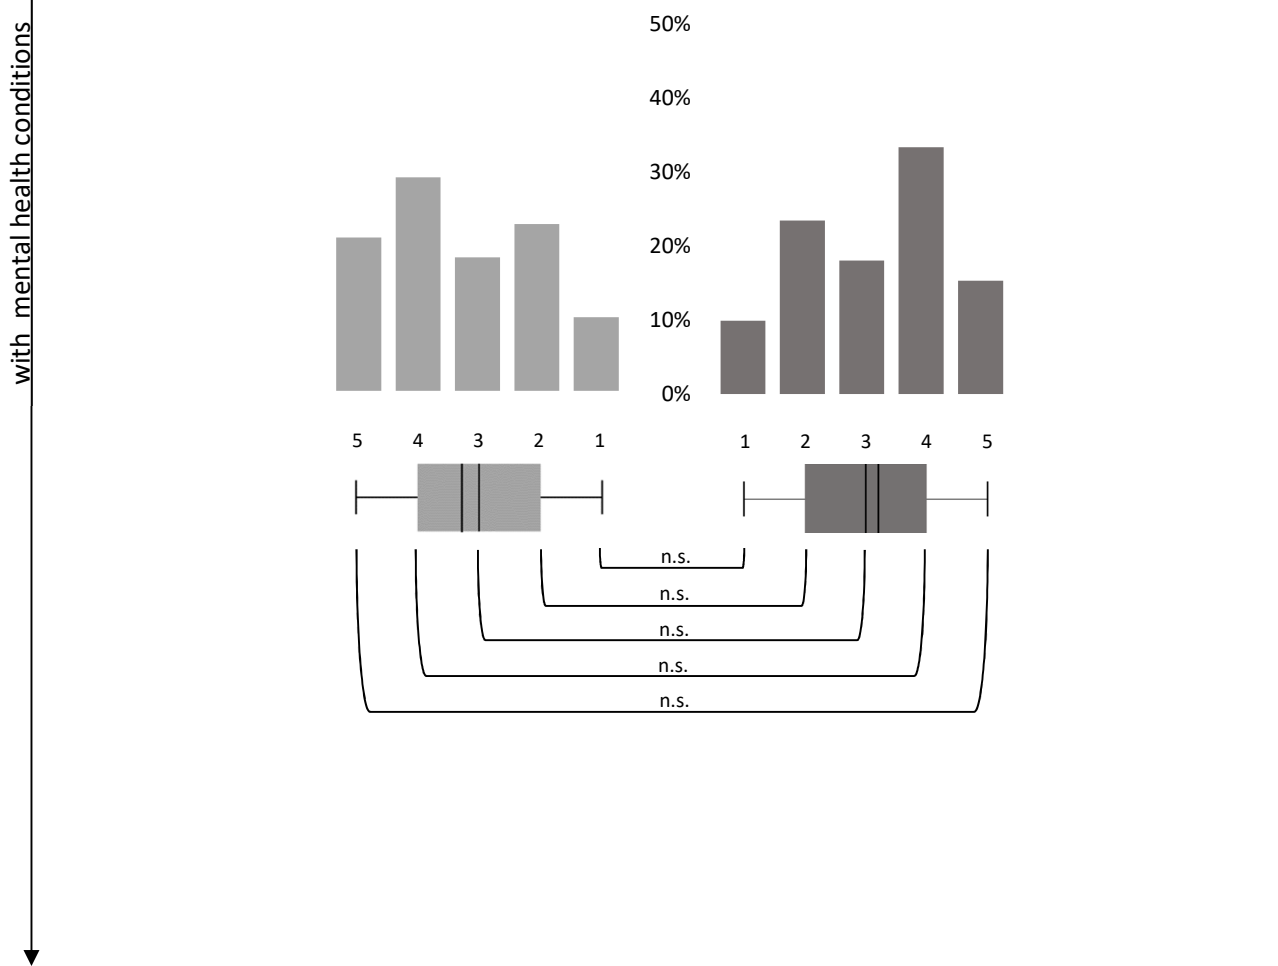

### h) How irritable or easily angered was your child?

- 1 not irritable
- 2 slightly irritable
- 3 moderately irritable
- 4 very irritable
- 5 extremely irritable

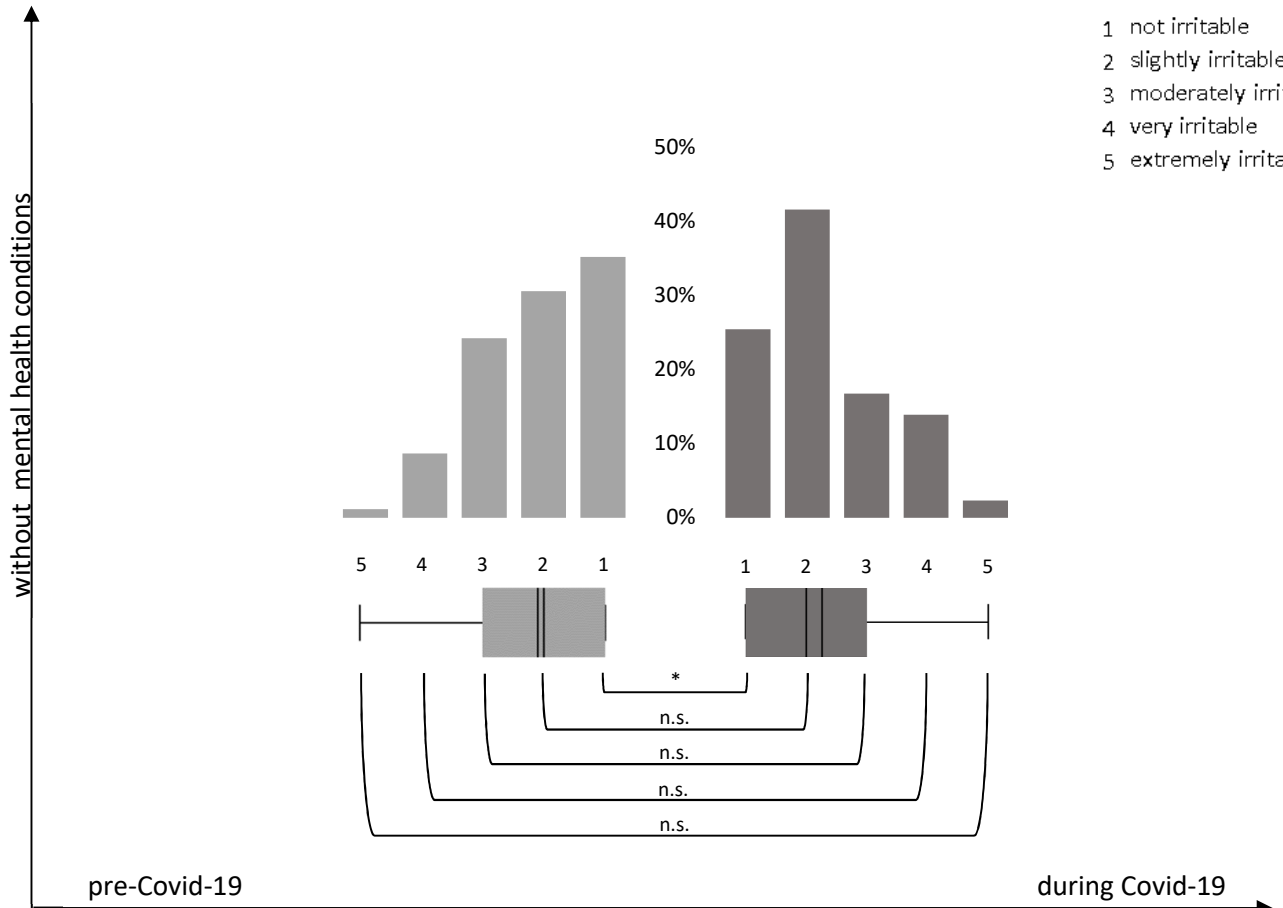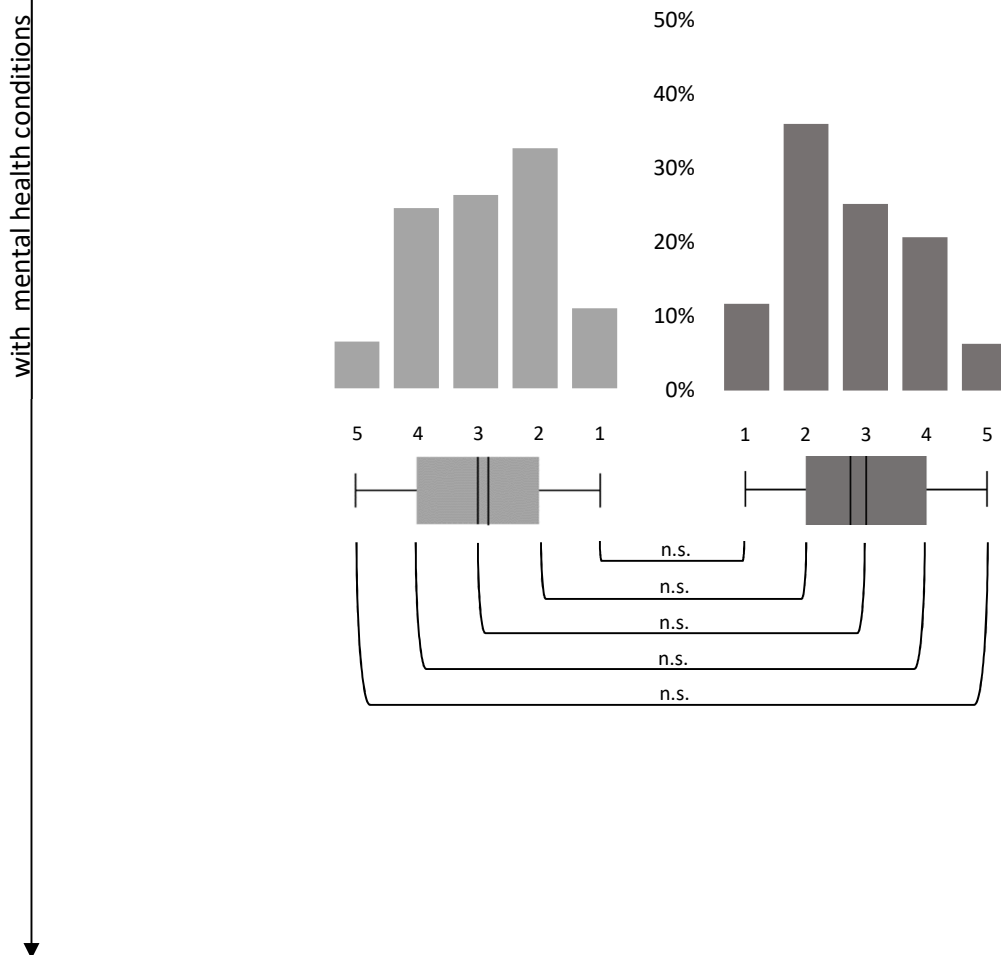





j) To what extent has your child had negative thoughts?

- 1 not at all
- 2 rarely
- 3 occasionally
- 4 often
- 5 Most of time

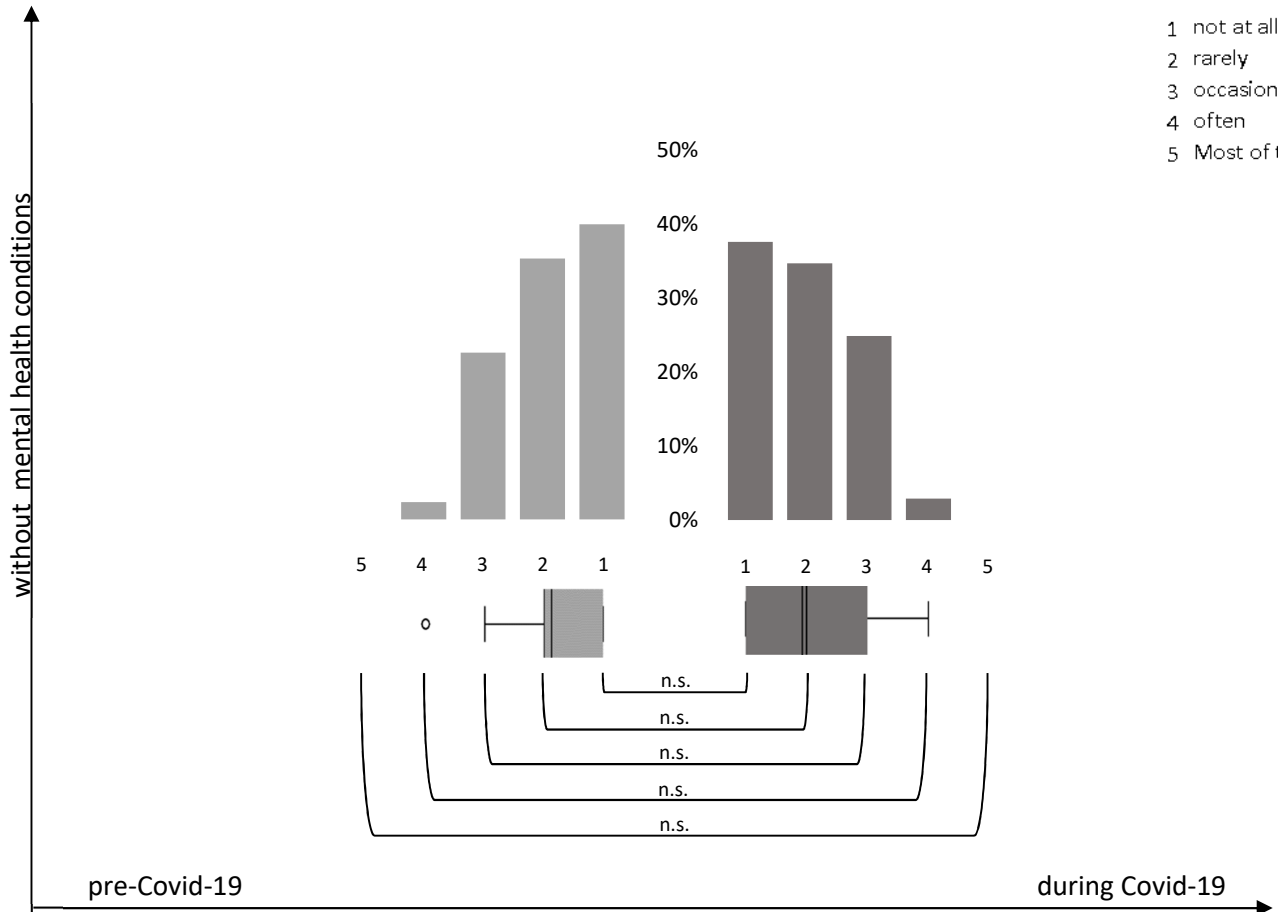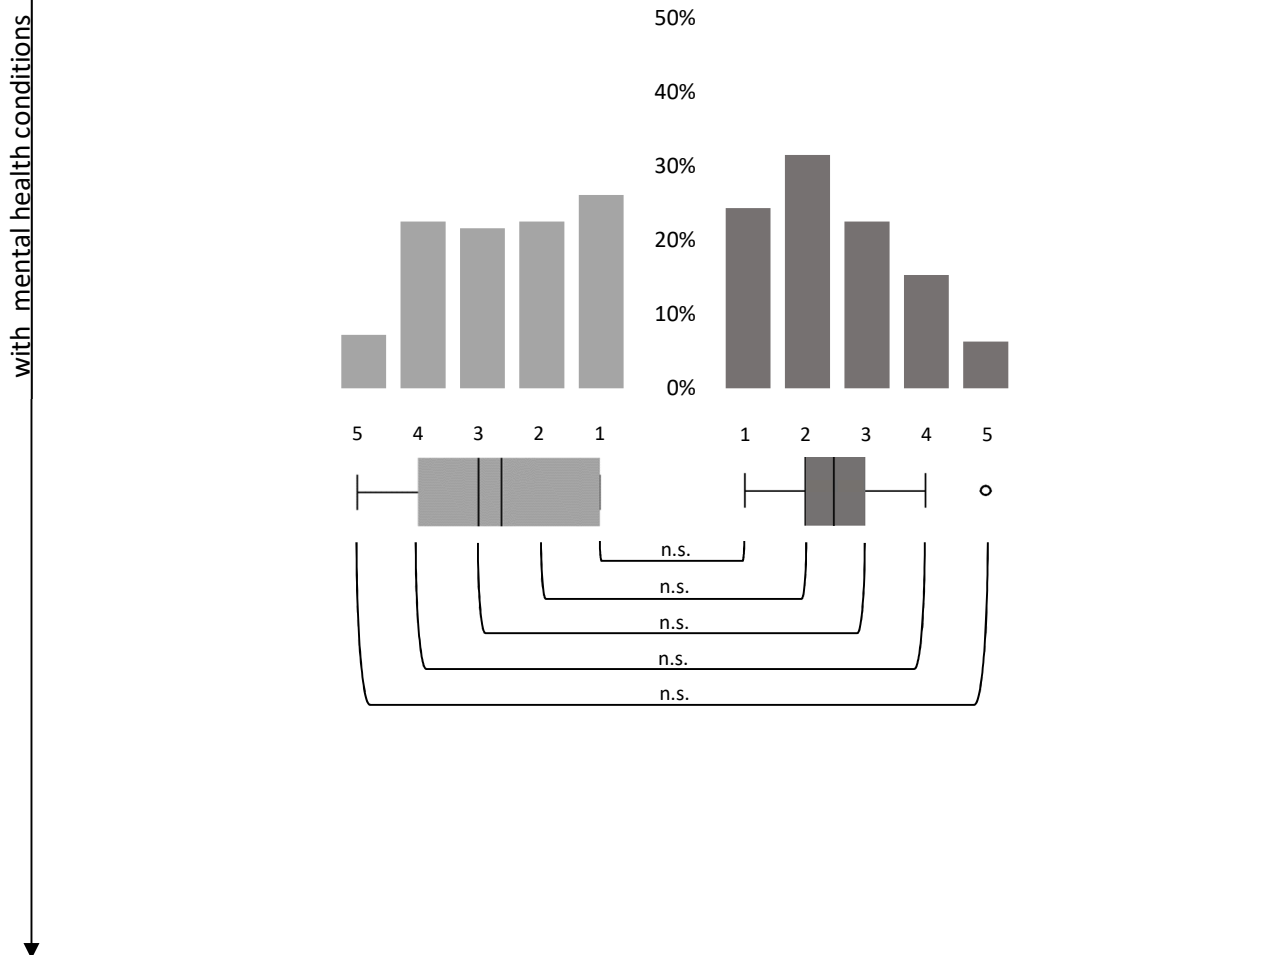

Supplement: MOESM2 [file 18887312]
