# Supplementary material for: Changes in emotions and worries during the Covid-19 pandemic: an online-survey with children and adults with and without mental health conditions
Source: Springer Nature journal article supplement (doi:10.1186/s13034-021-00363-9), 2021-02-21

a) How worried were you generally?

- 1 Not worried at all
- 2 Slightly worried
- 3 Moderately worried
- 4 Very worried
- 5 Extremely worried

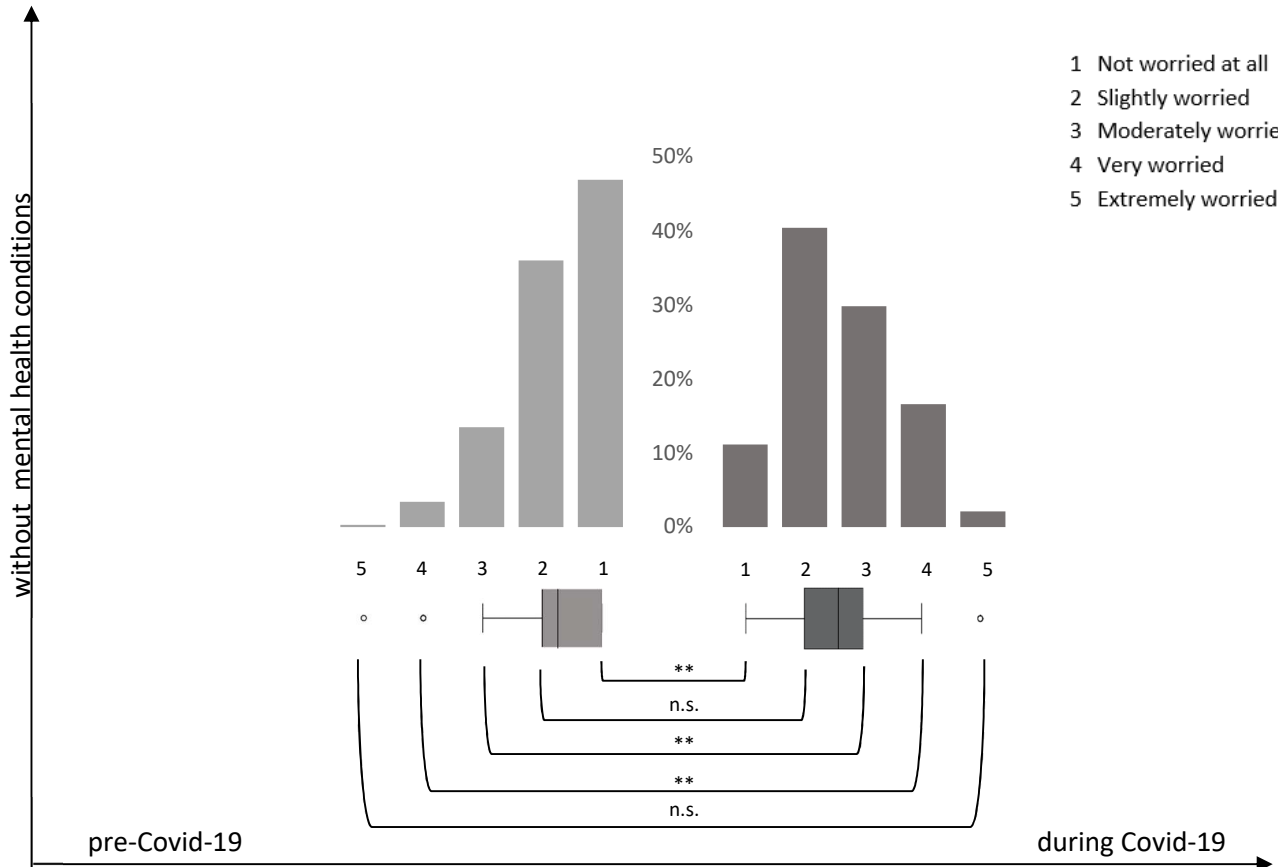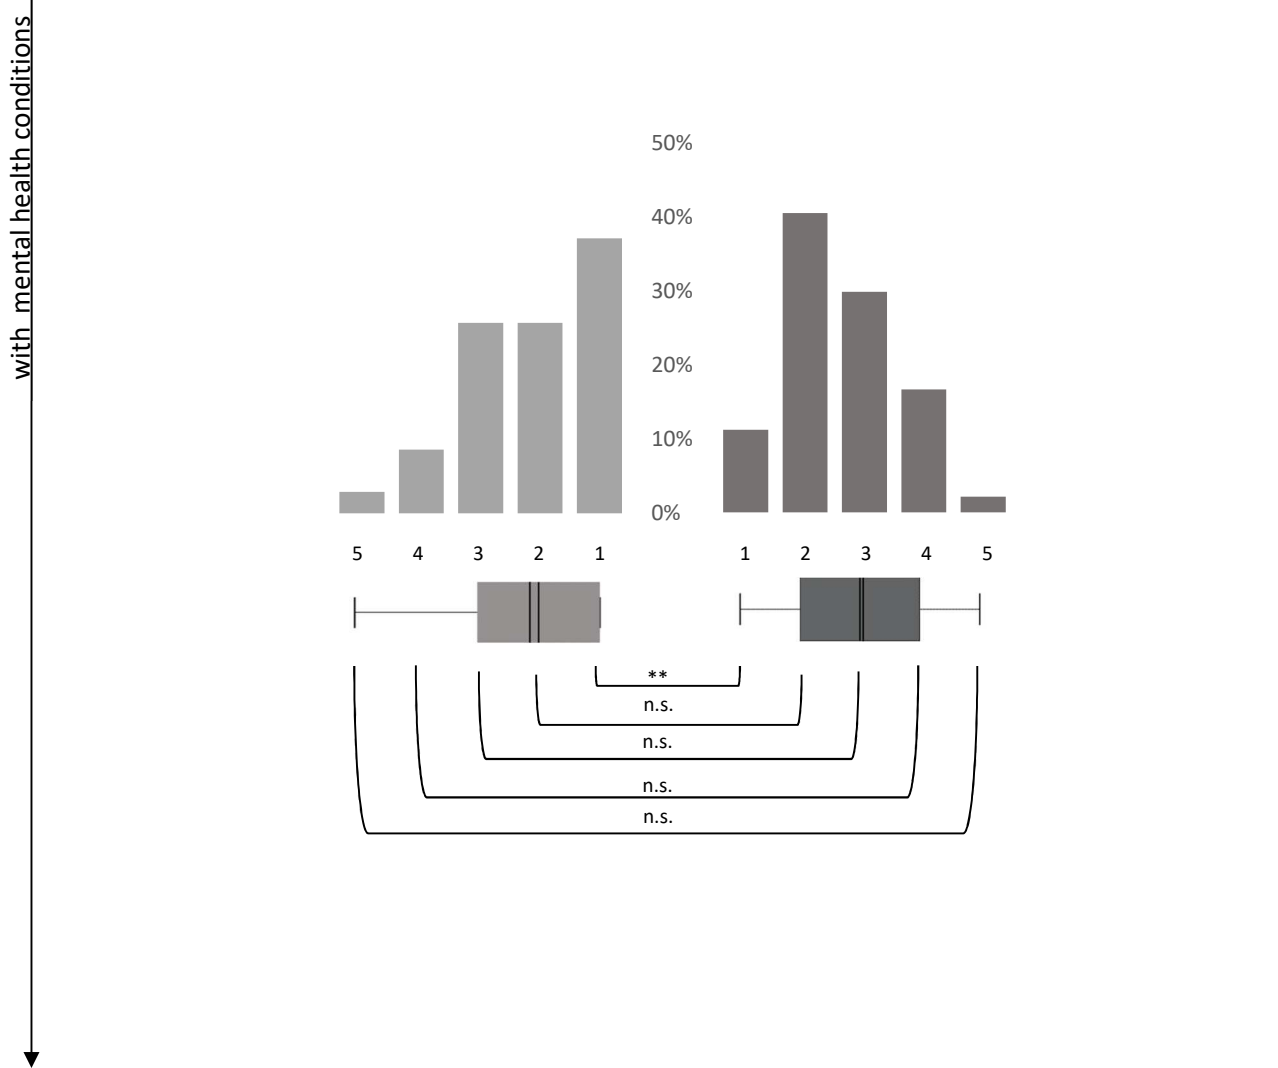





d) How relaxed versus anxious were you?

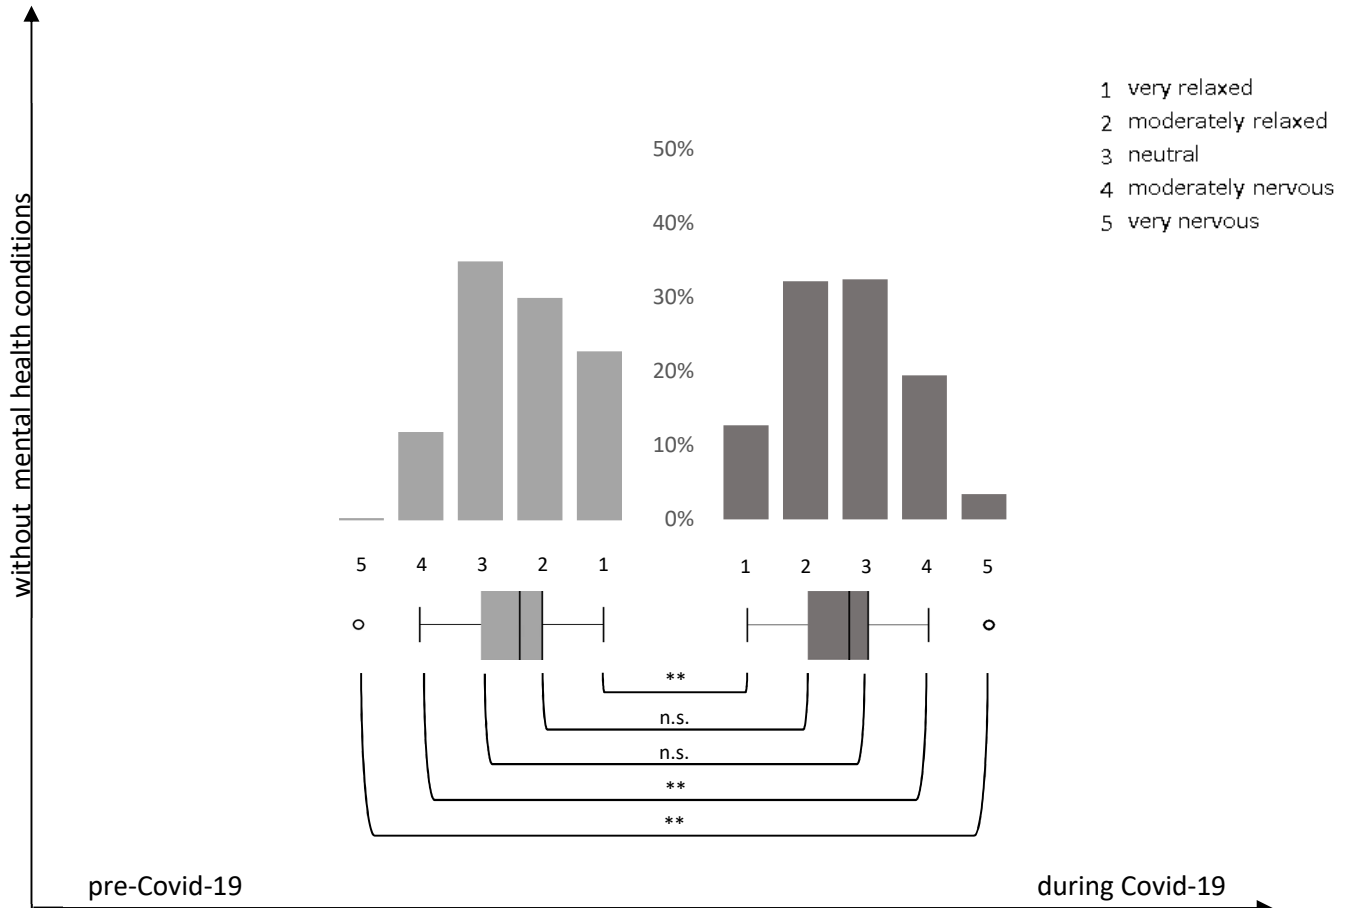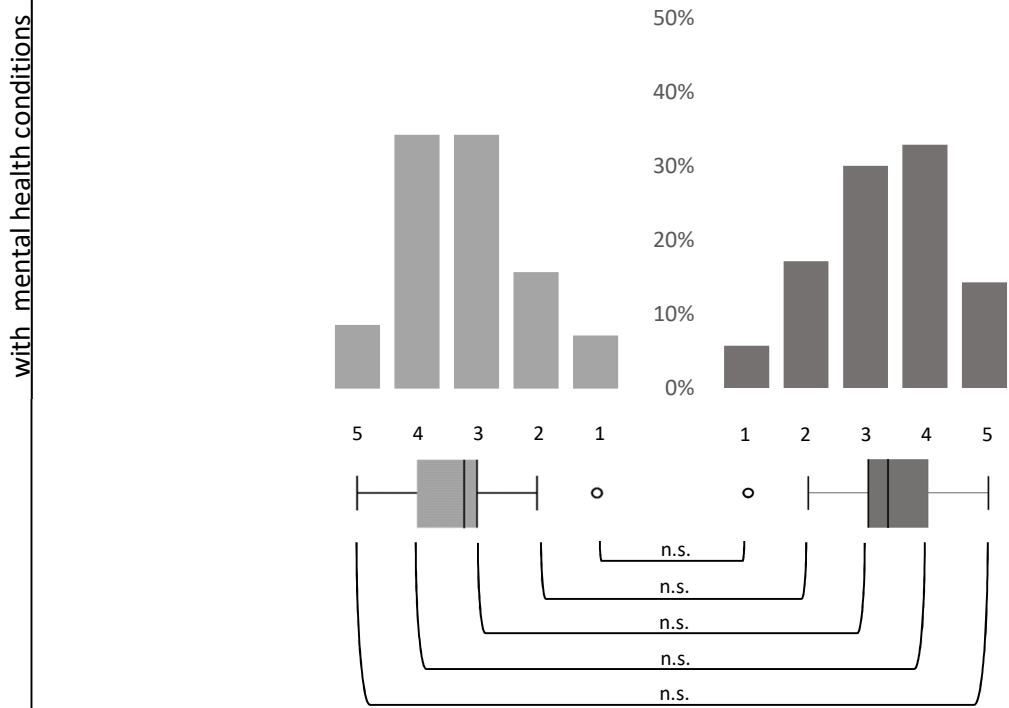

e) How fidgety or restless were you?

- 1 not fidgety
- 2 slightly fidgety
- 3 moderately fidgety
- 4 very fidgety
- 5 extremely fidgety

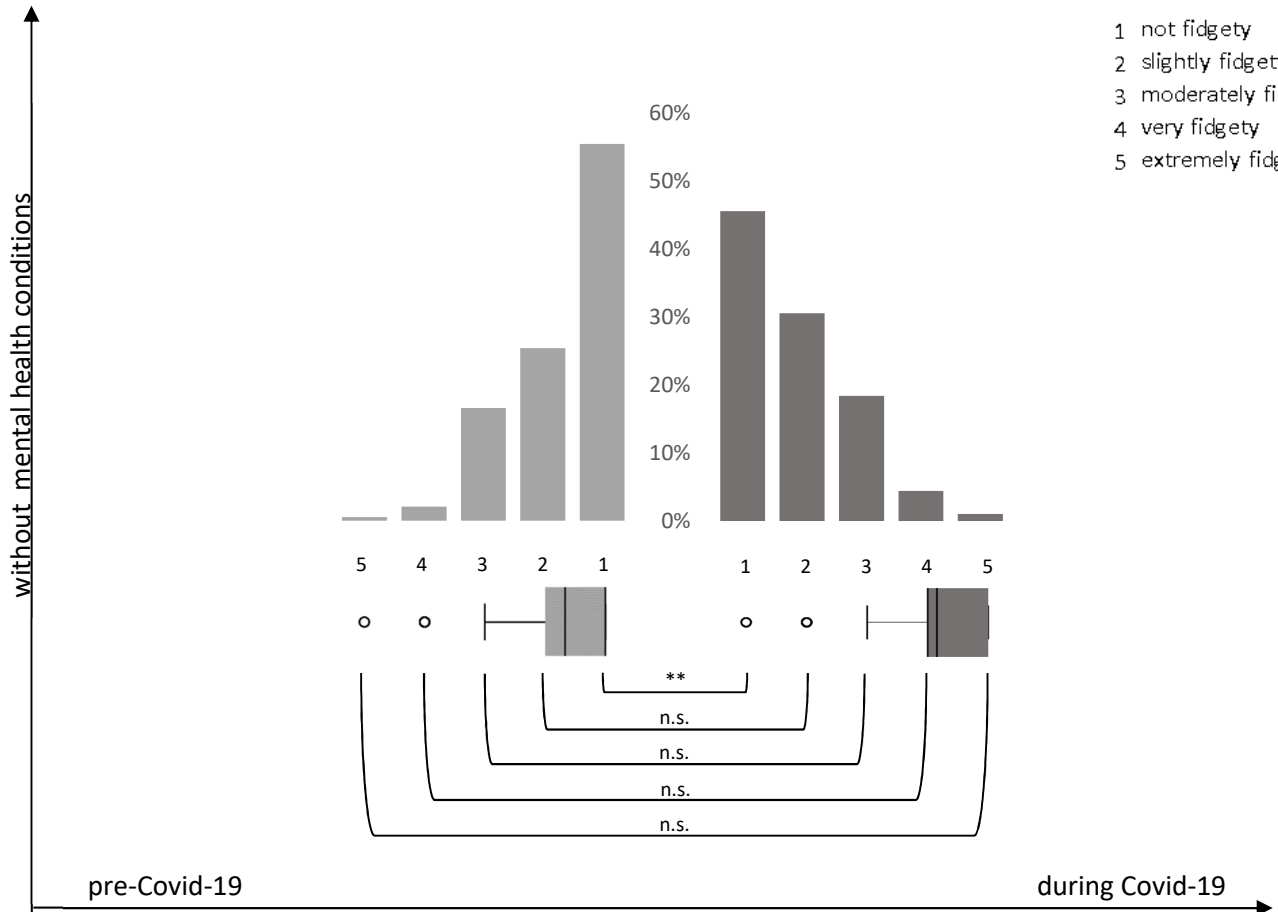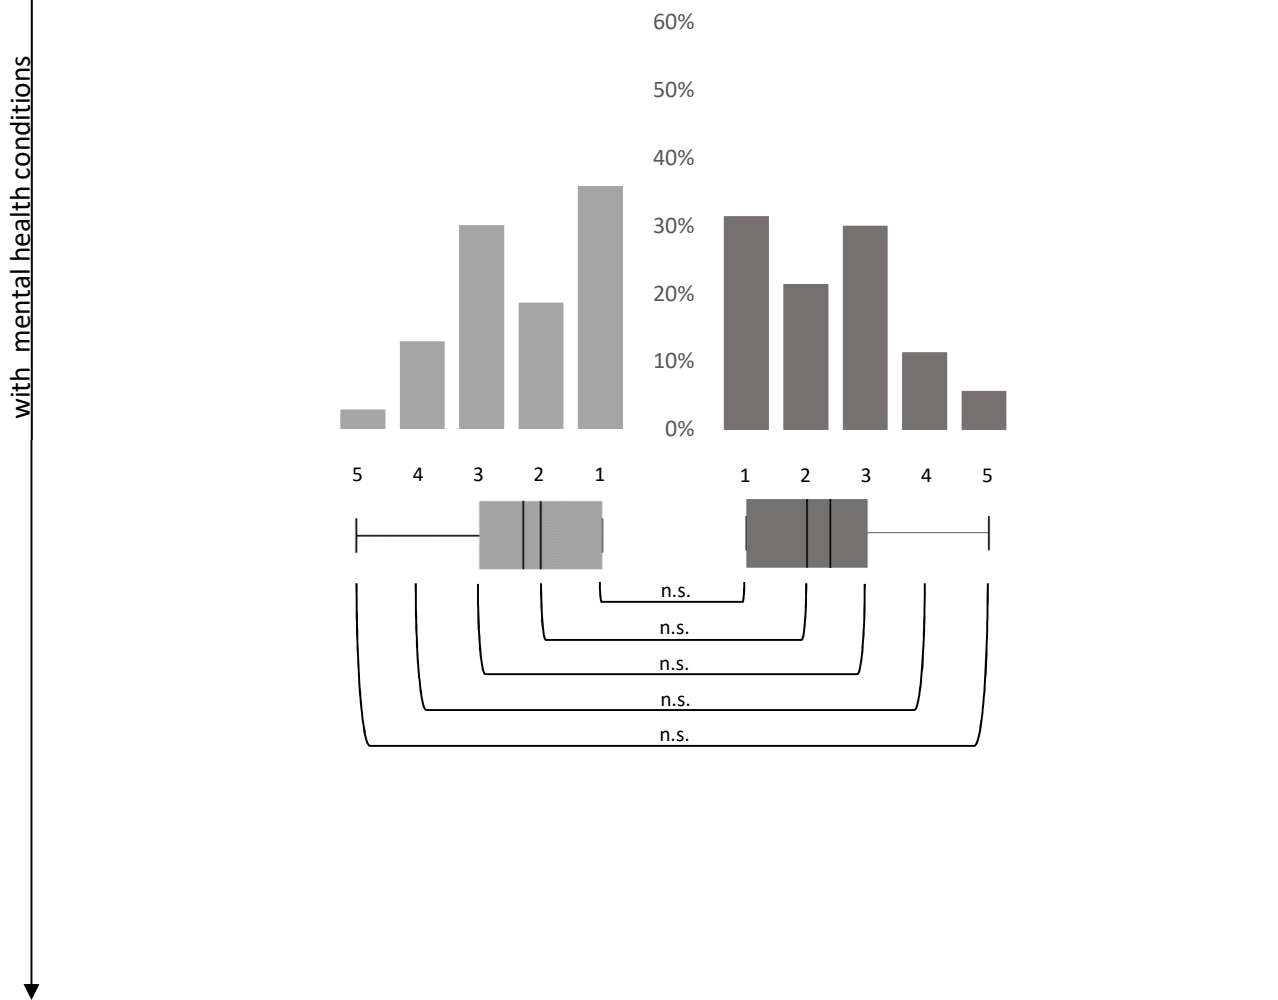

f) How fatigued or tired were you?

- 1 not fatigued
- 2 slightly fatigued
- 3 moderately fatigued
- 4 very fatigued
- 5 extremely fatigued

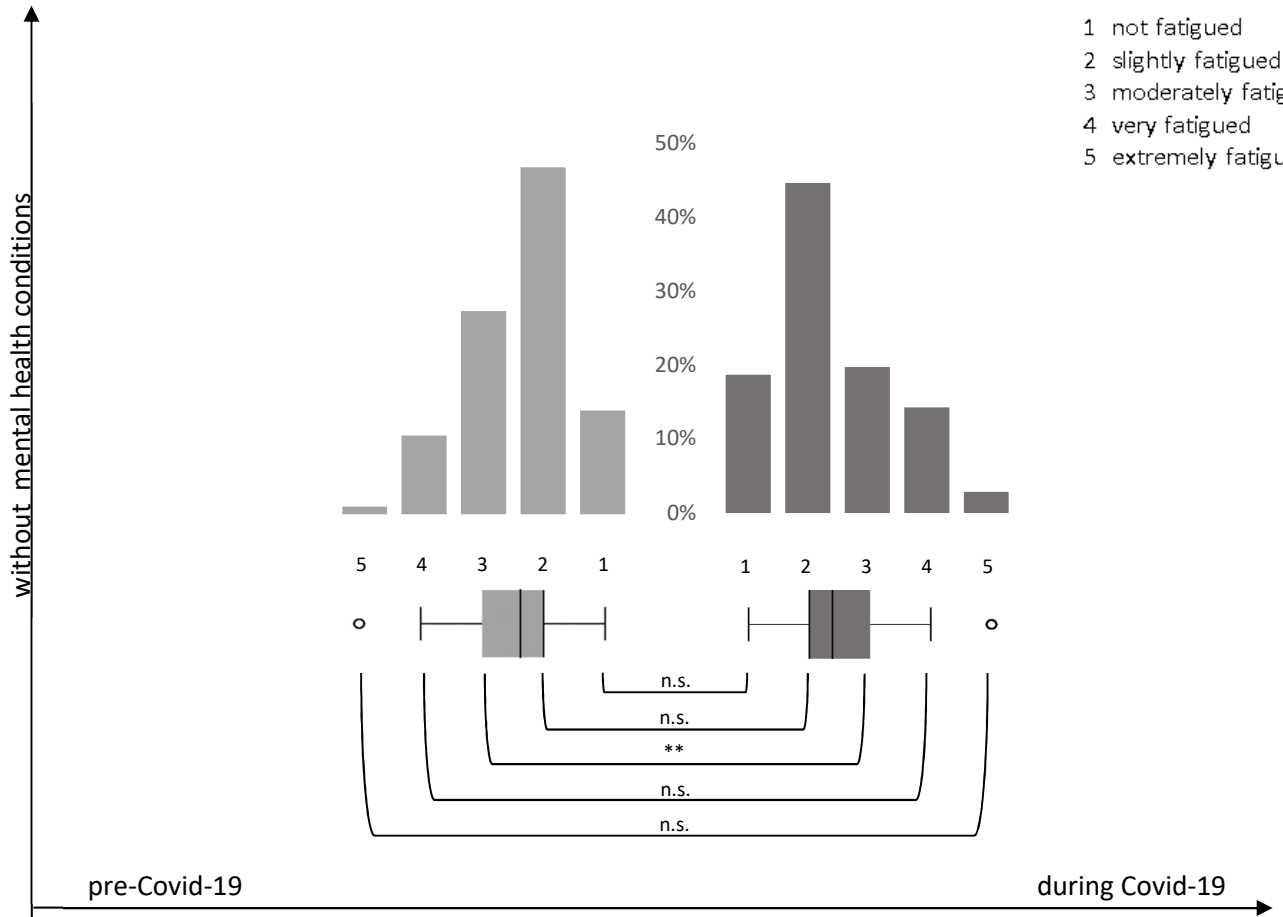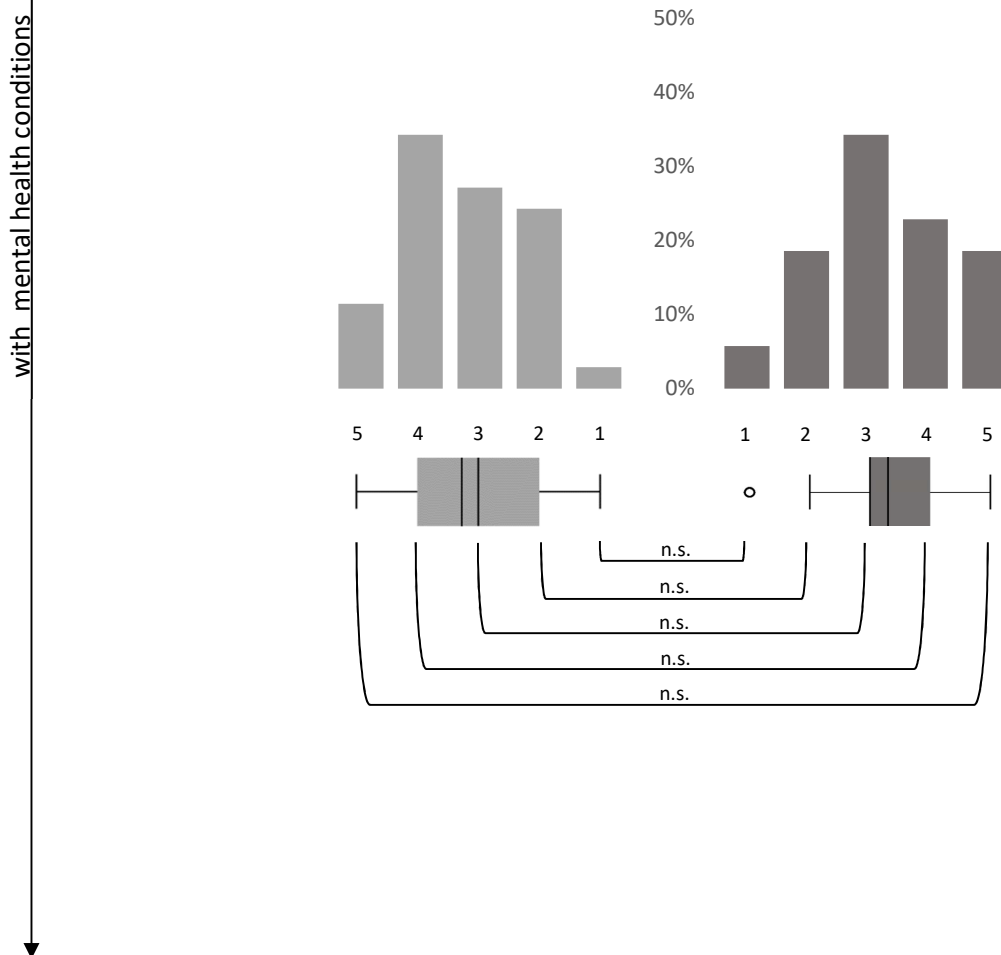









j) To what extent have you had negative thoughts?

- 1 not at all
- 2 rarely
- 3 occasionally
- 4 often
- 5 Most of time

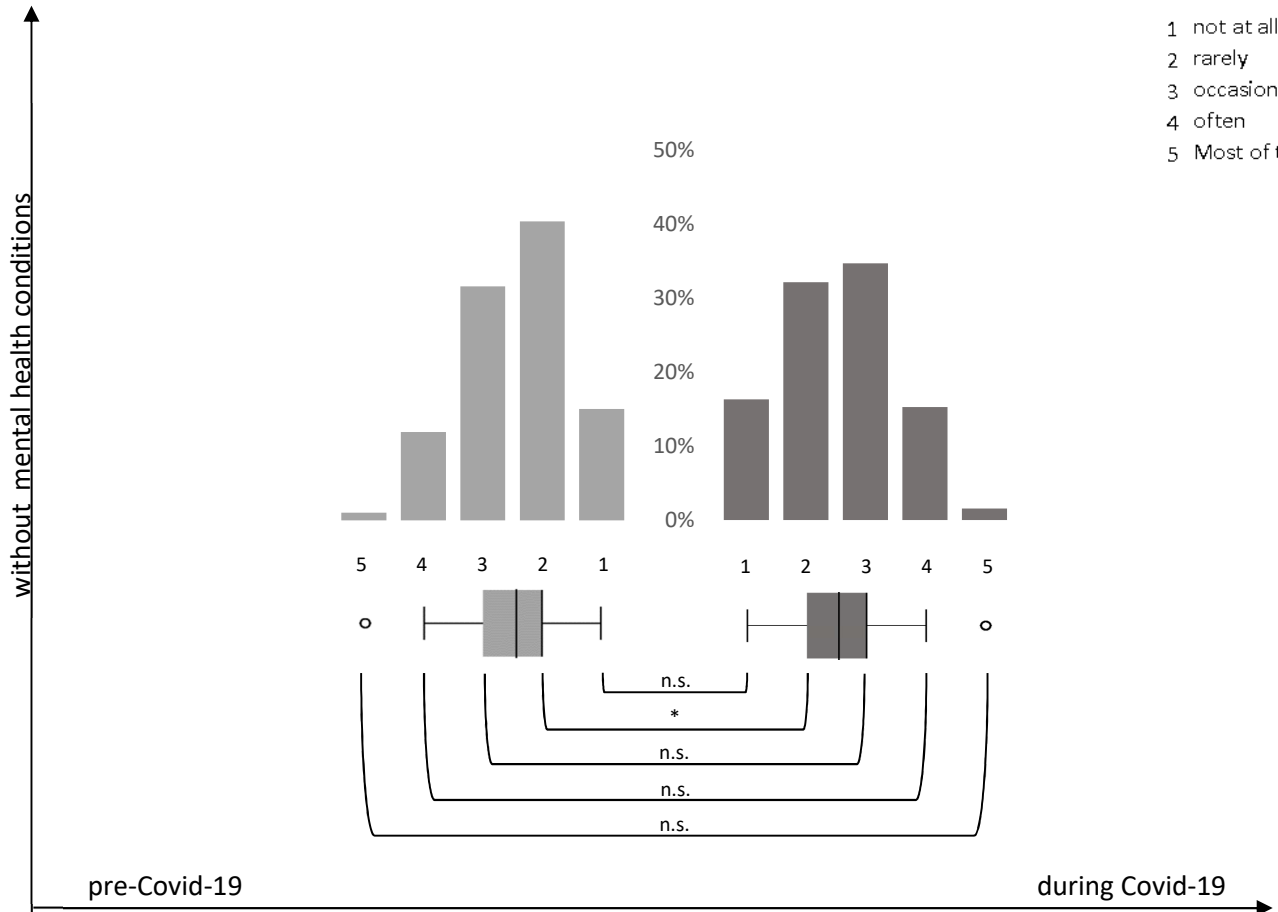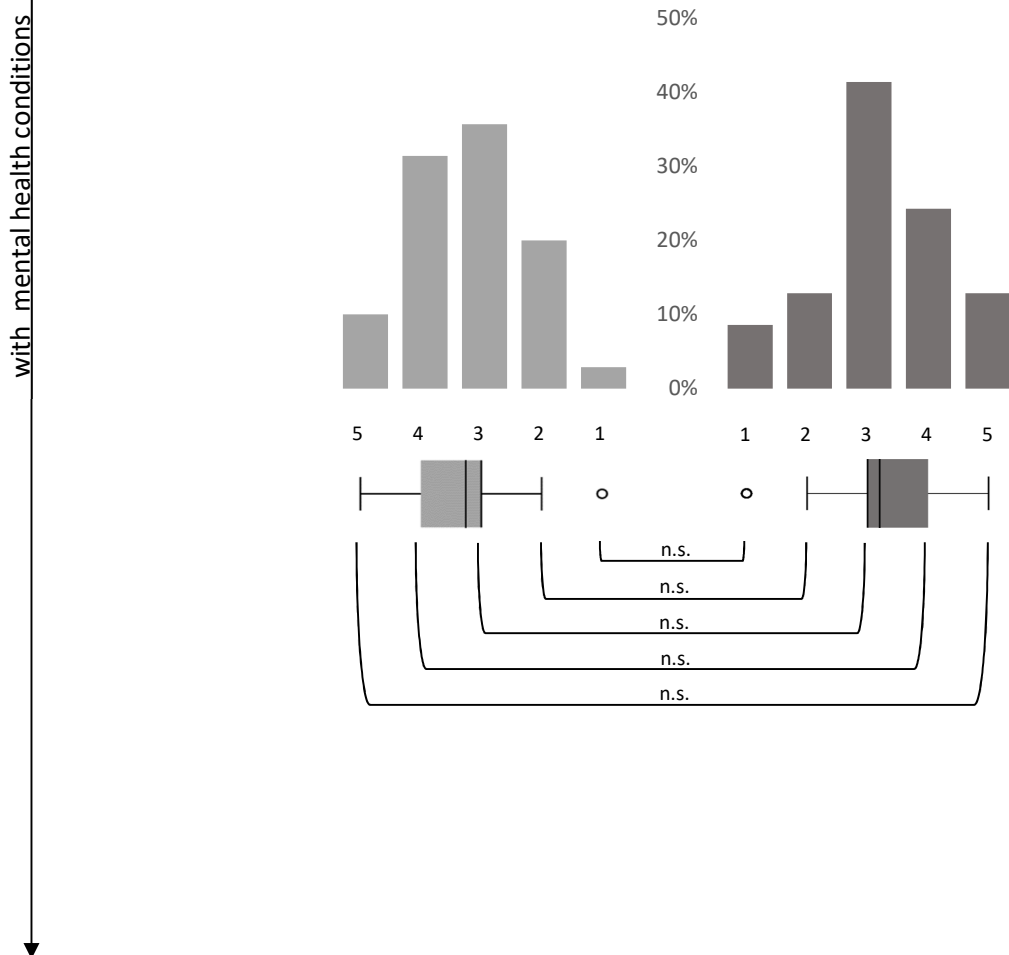

Supplement: MOESM1 [file 18887312]
